# The Genetic Variation of *SORCS1* Is Associated with Late-Onset Alzheimer's Disease in Chinese Han Population

Wei Xu<sup>1,9</sup>, Jun Xu<sup>2,9</sup>, Ying Wang<sup>1,9</sup>, Huidong Tang<sup>1</sup>, Yulei Deng<sup>1</sup>, Rujing Ren<sup>1</sup>, Gang Wang<sup>1</sup>, Wenquan Niu<sup>3</sup>, Jianfang Ma<sup>1</sup>, Yiwen Wu<sup>1</sup>, Jialin Zheng<sup>4</sup>, Shengdi Chen<sup>1,5\*</sup>, Jianqing Ding<sup>1,5\*</sup>

**1** Department of Neurology and Institute of Neurology, Rui Jin Hospital, School of Medicine, Shanghai Jiao Tong University, Shanghai, China, **2** Department of Neurology, Nanjing Medical University Affiliated Nanjing Brain Hospital, Nanjing, Jiangsu, China, **3** State Key Laboratory of Medical Genomics, Rui Jin Hospital, School of Medicine, Shanghai Jiao Tong University, Shanghai, China, **4** Pharmacology and Experimental Neuroscience and Pathology and Microbiology, University of Nebraska Medical Center, Omaha, Nebraska, United States of America, **5** Lab of Neurodegenerative Diseases and Key Laboratory of Stem Cell Biology, Institute of Health Science, Shanghai Institutes of Biological Sciences, Chinese Academy of Science and School of Medicine, Shanghai Jiao Tong University, Shanghai, China

## Abstract

The variations of *SORCS1* gene may play potential key roles in late-onset Alzheimer's disease (LOAD). To evaluate the relationship between the polymorphism of *SORCS1* gene and LOAD in the ethnic Han Chinese, we conducted a case-control study to investigate the association between the single-nucleotide polymorphisms (SNPs) in intron 1 of *SORCS1* and LOAD in Chinese Han population. Six reported SNPs in intron 1 of *SORCS1* were analyzed by Snapshot, genotyping and haplotyping in 236 Chinese LOAD cases and 233 matched controls. The significant differences in frequencies of two SNPs (rs10884402, rs950809) were found between the two groups. In addition, haplotype analyses revealed that, in the LOAD group, the frequency of haplotypes C-C-G-T-C (alleles in order of rs17277986, rs6584777, rs10884402, rs7078098, rs950809 polymorphisms) were significantly higher ( $P_{\text{sim}} < 0.0001$ ) while haplotype C-C-A-T-C, C-C-A-C-C, T-T-A-C-C were significantly lower ( $P_{\text{sim}} < 0.0001$ ). Our data suggested that the genetic variation of the rs10884402 and rs950809 in intron 1 of *SORCS1* was associated with the late-onset AD in the Chinese Han population.

**Citation:** Xu W, Xu J, Wang Y, Tang H, Deng Y, et al. (2013) The Genetic Variation of *SORCS1* Is Associated with Late-Onset Alzheimer's Disease in Chinese Han Population. PLoS ONE 8(5): e63621. doi:10.1371/journal.pone.0063621

**Editor:** Yanmin Yang, Stanford University School of Medicine, United States of America

**Received:** January 16, 2013; **Accepted:** April 4, 2013; **Published:** May 20, 2013

**Copyright:** © 2013 Xu et al. This is an open-access article distributed under the terms of the Creative Commons Attribution License, which permits unrestricted use, distribution, and reproduction in any medium, provided the original author and source are credited.

**Funding:** This study was supported by the National "Twelfth Five-Year" Plan for Science & Technology Support (No.2012BAI10803), National Natural Science Foundation of China (No. 81171200; No. 81028007, Shanghai Key Project of Basic Science Research (No. 09DZ1950400) and the Key Project of Shanghai Municipal Education Commission (No. 12ZZ115). The funders had no role in study design, data collection and analysis, decision to publish, or preparation of the manuscript.

**Competing Interests:** The authors have declared that no competing interests exist.

\* E-mail: chen\_sd@medmail.com.cn (SC); jqding18@yahoo.com (JD)

<sup>9</sup> These authors contributed equally to this work.

## Introduction

Alzheimer's disease is the most common form of dementia, which is characterized by senile plaques, neurofibrillary tangles and neuron loss [1,2]. In the early-onset family AD (EOFAD), three genes, amyloid precursor protein (APP), presenilin 1 (PS1), or presenilin 2 (PS2) [3,4] were demonstrated to directly influence A $\beta$  metabolism. In contrast to EOFAD, several risk genes such as apolipoprotein E (APOE), EPHA1, CD33 and MS 4A 6A [5,6,7] are involved in the pathogenesis and development of late-onset Alzheimer's disease (LOAD), in which APOE is the most notable. APOE  $\epsilon$ 4 allele may account for nearly 50% of the genetic risk in LOAD [8,9].

Although the pathogenetic mechanisms of AD are undetermined, the APP processing and A $\beta$  generation have been proven to be crucial in the pathogenesis of AD [10,11]. Extracellular accumulation of the amyloid- $\beta$  (A $\beta$ ) peptides leads to senile plaques formation. Sorting mechanisms that lead the colocalization of APP,  $\beta$ -secretases and  $\gamma$ -secretases in the same intracellular compartment may play an important part in A $\beta$  generation in AD [12,13,14]. Sortilin-related VPS10 domain containing receptor 1 (*SorCS1*), which maps to chromosome 10q23–25, belongs to Vps10p-domain sorting receptor family [15,16,17]. SorCS1 is

prominently expressed in the nervous system and may be important for neuronal activities [15,18]. SorCS1 was reported that it could influence APP processing and modulate A $\beta$  metabolism [19,20]. Overexpression of SorCS1 might lead to the reduction of  $\gamma$ -secretase activity and A $\beta$  levels. Oppositely, suppression of SorCS1 increased  $\gamma$ -secretase processing of APP and the levels of A $\beta$  [20]. In addition, one genome-wide association study (GWAS) in French has identified *SORCS1* as a candidate gene for AD [21]. All these suggested that *SORCS1* were associated with the prevalence of AD.

Based on the result reported by Reitz and his colleagues which indicated several SNPs in intron 1 of *SORCS1* were genetic associated with LOAD and memory retention [20,22], we conducted a case-control study ( $n = 469$ ) to determine the prevalence of six reported SNPs (rs17277986, rs6584777, rs12251340, rs10884402, rs7078098 and rs950809) in patients with LOAD in Chinese Han population of mainland, trying to explore the genetic association between the polymorphism of *SORCS1* and LOAD. As APOE $\epsilon$ 4 allele and the history of type-2 diabetes mellitus were confirmed worldwide as important factors to LOAD, we further analyzed the relationship between these factors and SNPs in LOAD.

**Table 1.** Primer design.

| SNP ID           |                  | Primer Name     | Sequence                                         | TM(°C) |
|------------------|------------------|-----------------|--------------------------------------------------|--------|
| rs17277986       | The PCR Primer   | rs17277986-L    | 5'-TCAGTCTCCCATTTGTTGCT-3'                       | 59.73  |
|                  |                  | rs17277986-R    | 5'-AGGCTCTGGAAGGCATTTT-3'                        | 60.21  |
|                  | The anchor probe | rs17277986-SNP2 | 5'-tttttttctcagattccaagaattattcagc-3'            | 57.14  |
| rs6584777        | The PCR Primer   | rs6584777-L     | 5'-CAGAGTGTGATCCCATCTCAA-3'                      | 58.70  |
|                  |                  | rs6584777-R     | 5'-CTCCACCATGTGGAAGTGTG-3'                       | 60.00  |
| rs12251340 [G/T] | The anchor probe | rs6584777-SNP   | 5'-tttttttTAACTCTGATATCCAAGTTTGATTC-3'           | 57.03  |
|                  |                  | rs12251340-SNP  | 5'-CACCATGTGGAAGTGTGAGT-3'                       | 55.17  |
| rs10884402       | The PCR Primer   | rs10884402-L    | 5'-TGCCTGTACAACGAGCTCAC-3'                       | 60.06  |
|                  |                  | rs10884402-R    | 5'-AGGTCCCTTTGCTGTCT-3'                          | 60.11  |
|                  | The anchor probe | rs10884402-SNP  | 5'-tttttttGCCAGCAGAAAGAGAATGT-3'                 | 57.92  |
| rs7078098        | The PCR Primer   | rs7078098-L     | 5'-ACTCCTGATGCTCTGGGAGA-3'                       | 59.94  |
|                  |                  | rs7078098-R     | 5'-AGGGTGCTCCAGATGTGAC-3'                        | 60.12  |
|                  | The anchor probe | rs7078098-SNP   | 5'-ttttttttttttttTGATGCTGATTAACAGTTTTCCC-3'      | 58.97  |
| rs950809         | The PCR Primer   | rs950809-L      | 5'-CATTGACAGGCAAAGCAAGT-3'                       | 58.93  |
|                  |                  | rs950809-R      | 5'-GCATGGTTCTCTTTGGAGGA-3'                       | 60.20  |
|                  | The anchor probe | rs950809-SNP    | 5'-ttttttttttttttTTGTAGGTGATGTTGCAATCAGT-3'      | 59.41  |
|                  |                  | rs950809-SNP2   | 5'-ttttttttttttttttttttttGATGAGGCATAGGGCTCACT-3' | 57.74  |

doi:10.1371/journal.pone.0063621.t001

## Methods

### Subjects

Our study included 236 sporadic LOAD and 233 healthy controls of Chinese Han ethnicity. All patients, which were enrolled from the outpatient clinic at the Department of Neurology, Ruijin Hospital affiliated to Shanghai Jiaotong University School of Medicine and were evaluated by a experienced neurologist and a psychiatrist, had a clinical diagnosis of possible or probable AD according to the Alzheimer's Criteria of National Institute of Neurological and Communicative Disorders and Stroke and the Alzheimer's Disease and Related Disorders Association (NINCDS-ADRDA) [23]. All control subjects were recruited from the epidemiological investigation of Shanghai, which were matched for age, gender, and ethnic background. All subjects were unrelated Chinese Han and had no family history of AD. The average age of AD group was 72.28±7.87 years old (Mean age at onset) with the average MMSE score 15.96±5.99, 50.8% were male AD. And the average age of control was 72.88±7.30 years old (Mean age at examination) with the average MMSE score 28.35±1.42, male accounted for 58.3%. The study was approved and authorized by the Research Ethics Committee, Rui Jin Hospital affiliated to School of Medicine, Shanghai Jiao Tong University, Shanghai, China. All participants were fully informed, and had signed a formally written consent.

### Genotyping

DNA was isolated from peripheral blood through standardized phenol/chlorine extraction method. Genotyping analysis of APOE was performed as previously described [24]. The *SORCS1* SNPs (rs17277986, rs6584777, rs12251340, rs10884402, rs7078098 and rs950809) were genotyped using the method of SNaPshot, which was based on the dideoxy single-base extension of an unlabeled oligonucleotide primer (or primers), with technical support from the Shanghai Southgene Technology Co. LTD.

All amplification primers were synthesized by standard phosphoramidite chemistry (Sangon Biotech). The primers and probe sequences which were used are summarized in Table 1. The amplification of the target fragment was carried out on a PCR Amplifier (MJ Research PT-100) in a total volume of 10 µl containing ~20 ng of DNA, 0.4 µM each of the primers, 0.3 mM dNTP (Generay Biotech), 0.25 U HotStarTaq DNA Polymerase (QIAGEN). The final concentration of Mg<sup>2+</sup> in the reaction mixture was adjusted to 3.5 mM. The cycle conditions were as following: denaturation of the template DNA for 1 cycle of 95°C for 5 mins; amplification of the target fragment for 45 cycles of 95°C for 30 s, 60°C for 60 s, and 72°C for 180 s. The PCR products were electrophoresed on 2% agarose gel and visualized under UV light. 2 U Shrimp Alkaline Phosphatase (USB) and 2 U Exonuclease I (Epicentre) was used to purify the target fragment. The mixture was incubated at 37°C for 1 hour and then was incubated at 75°C for 15 mins to inactivate the enzymes. All the primers to be used for SNaPshot reaction should be premixed to reach a final concentration of 0.2 µM. The total volume of SNaPshot PCR mixture was 5 µl, containing 1 µL SNaPshot Multiplex Ready Reaction Mix (ABI), 2 µL Pooled PCR products, 1 µL Pooled SNaPshot primers and 1 µL deionized water. The cycle conditions for SNaPshot were as following: denaturation of the template for 1 cycle of 95°C for 10 s; amplification of the target fragment for 25 cycles of 95°C for 10 s, 50°C for 5 s, and 60°C for 30 s. Add 0.5 Unit of Shrimp Alkaline Phosphatase (USB) to the reaction mixture, mix thoroughly, and incubated at 37°C for 1 hour. The enzyme was deactivated by incubating the mixture at 75°C for 15 mins. Dilute 0.5 µL of SNaPshot product and 0.25 µL of GeneScan-120 LIZ (ABI) in 9.25 µL of Hi-Di formamide (ABI), vortex briefly and quick spin, then denature the samples by placing them at 95°C for 5 minutes. Electrophoresis was performed on the ABI PRISM 3730 DNA Analyzer according to the manufacturer's instructions.

**Table 2.** Genotype and allele frequencies for rs17277986, rs6584777, rs12251340, rs10884402, rs7078098 and rs950809 SNPs and three genetic modes of inheritance for the five studied polymorphisms in *SORCS1* gene.

| SNP ID     | Group   | n   | Genotype frequency (%) |           |          | P-value | MAF  | P-value | Models    | OR; 95% CI; P <sup>a</sup> |
|------------|---------|-----|------------------------|-----------|----------|---------|------|---------|-----------|----------------------------|
|            |         |     | CC                     | CT        | TT       |         |      |         |           |                            |
| rs17277986 | AD      | 236 | 173(73.3)              | 60(25.4)  | 3(1.3)   | 0.922   | 0.14 | 0.719   | Additive  | 0.93(0.64,1.36),0.71       |
|            | Control | 233 | 167(71.7)              | 63(27)    | 3(1.3)   |         |      |         | Dominant  | 0.92(0.6,1.38),0.69        |
|            |         |     |                        |           |          |         |      |         | Recessive | 0.99(0.2,4.94),0.99        |
| rs6584777  | AD      | 236 | 173(73.3)              | 60(25.4)  | 3(1.3)   | 0.974   | 0.14 | 0.863   | Additive  | 0.97(0.66,1.41),0.86       |
|            | Control | 233 | 169(72.5)              | 61(26.2)  | 3(1.3)   |         |      |         | Dominant  | 0.96(0.64,1.45),0.85       |
|            |         |     |                        |           |          |         |      |         | Recessive | 0.99(0.2,4.94),0.99        |
| rs12251340 | AD      | 236 | 236(100)               | 0(0)      | 0(0)     | NA      | 0    | NA      | Additive  | NA                         |
|            | Control | 233 | 233(100)               | 0(0)      | 0(0)     |         |      |         | Dominant  | NA                         |
|            |         |     |                        |           |          |         |      |         | Recessive | NA                         |
| rs10884402 | AD      | 236 | 102(43.2)              | 112(47.5) | 22(9.3)  | 0.0001  | 0.33 | 0.0004  | Additive  | 0.63(0.49,0.82),<0.001     |
|            | Control | 233 | 81(34.8)               | 97(41.6)  | 55(23.6) |         |      |         | Dominant  | 0.7(0.48,1.02),0.06        |
|            |         |     |                        |           |          |         |      |         | Recessive | 0.33(0.2,0.57),<0.001      |
| rs7078098  | AD      | 236 | 117(49.6)              | 101(42.9) | 18(7.6)  | 0.325   | 0.29 | 0.207   | Additive  | 1.2 (0.91,1.58),0.208      |
|            | Control | 233 | 107(45.9)              | 99(42.5)  | 27(11.6) |         |      |         | Dominant  | 1.16 (0.81,1.66),0.428     |
|            |         |     |                        |           |          |         |      |         | Recessive | 1.59 (0.85,2.97),0.148     |
| rs950809   | AD      | 236 | 87(36.9)               | 126(53.4) | 23(9.7)  | 0.036   | 0.36 | 0.79    | Additive  | 1.04(0.79,1.36),0.79       |
|            | Control | 233 | 101(43.3)              | 98(42.1)  | 34(14.6) |         |      |         | Dominant  | 1.31(0.9,1.9),0.15         |
|            |         |     |                        |           |          |         |      |         | Recessive | 0.63(0.36,1.11),0.11       |

Abbreviations: OR, odds ratio; 95% CI, 95% confidence interval; MAF, minor allele frequency; NA, not available.

Genotypes and alleles are expressed as number (percentage). P values were calculated by  $\chi^2$  test  $3 \times 2$  contingency table for genotype distribution and  $2 \times 2$  contingency table for allele distribution.

<sup>a</sup>Adjusting for age and gender.

doi:10.1371/journal.pone.0063621.t002

## Statistical Analysis

Statistical calculations were done using SAS v.9.1.3 (Institute Inc., Cary, NC). Means of continuous variables were compared by unpaired t-test. The  $\chi^2$  test or Fisher's exact test was used to assess the goodness-of-fit between the observed allele frequencies and the expected counterparts by Hardy-Weinberg equilibrium and to evaluate the differences in genotype and allele distributions between cases and controls. Each genotype was assessed by logistic regression analysis assuming additive, dominant and recessive modes of inheritance, respectively. A two-tailed  $P < 0.05$  was accepted as statistically significant.

The linkage disequilibrium patterns were identified in all samples by Haploview v.4.0 available at [www.sourceforge.net](http://www.sourceforge.net). The linkage disequilibrium coefficients were shown as  $D'$  on the basis of 4 gamete color scheme. Traditionally, a haplotype was defined as a combination of multiple alleles in a chromosome. This was because alleles on the same chromosome were in the close proximity and might interact with each other. The haplo.em program was used to estimate the haplotype frequencies for the polymorphisms. This program estimated maximum likelihood of haplotype probability using the progressive insertion algorithm that progressively inserts batches of loci into haplotypes of growing lengths. The haplo.cc and haplo.glm were employed to calculate crude and adjusted odds ratios (ORs) and 95% confidence intervals (CIs) for each haplotype, respectively. These two approaches were based on a generalized linear model, and computed the regression of a trait on haplotypes and other covariates [25,26]. Furthermore, the haplo.score was used to model an individual phenotype as a function of each inferred haplotype, weighed by their estimated probability, to account for haplotype ambiguity. It was based on score statistics, which

provided both global tests and haplotype specific tests [27]. Simulated P (Psim) values were obtained from 1000 replicates. The haplo.em, haplo.glm and haplo.score were implemented in the program Haplo.stats software (version 1.4.0) developed by the R language (<http://www.r-project.org>).

## Results

The baseline characteristics between patients with Alzheimer's disease and healthy controls were compared. No statistical differences were observed for age and gender between patients and controls ( $P > 0.05$ ). But significantly lower MMSE score was found in LOAD patients compared to the controls ( $P < 0.001$ ). Distributions of the APOE polymorphisms in both AD patients and controls were as expected.

### Single-point Association Analysis

There were no deviations from Hardy-Weinberg equilibrium for all studied polymorphisms in LOAD and controls ( $P > 0.05$ ). Three polymorphisms in *SORCS1* did not reach significant differences in the genotype or allele frequencies in the total sample (genotype: rs17277986  $P = 0.923$ , rs6584777  $P = 0.982$ , rs7078098  $P = 0.325$ ; Allele: rs17277986  $P = 0.719$ , rs6584777  $P = 0.863$ , rs7078098  $P = 0.207$ ). rs10884402 polymorphism was demonstrated to have significant differences in both genotype and allele frequencies between the two groups in the total sample (genotype  $P = 0.0001$ ; allele  $P = 0.0004$ ). rs950809 polymorphism showed an edge difference in the genotype frequencies ( $P = 0.036$ ) but no differences in the allele frequencies ( $P = 0.79$ ). The results of three genetic modes of inheritance for the six studied genotypic polymorphisms in *SORCS1*, which were assessed by logistic

**Table 3.** Genotype and allele frequencies for the five studied polymorphisms in *SORCS1* gene in Alzheimer's patients and controls stratified by ApoE carrier status.

| SNP ID     | Group     | n       | Genotype frequency (%) |          |          | P-value  | MAF   | P-value |       |
|------------|-----------|---------|------------------------|----------|----------|----------|-------|---------|-------|
|            |           |         | CC                     | CT       | TT       |          |       |         |       |
| rs17277986 | ApoEε4(-) | AD      | 130                    | 94(72.3) | 34(26.2) | 2(1.5)   | 0.899 | 0.15    | 0.94  |
|            |           | control | 189                    | 136(72)  | 50(26.4) | 3(1.6)   |       | 0.15    |       |
|            | ApoEε4(+) | AD      | 106                    | 79(74.5) | 26(24.5) | 1(1)     | 0.675 | 0.13    | 0.72  |
|            |           | control | 44                     | 31(70.5) | 13(29.5) | 0(0)     |       | 0.15    |       |
| rs6584777  | ApoEε4(-) | AD      | 130                    | 94(72.3) | 34(36.2) | 2(1.5)   | 0.988 | 0.15    | 0.91  |
|            |           | control | 189                    | 138(73)  | 48(25.4) | 3(1.6)   |       | 0.14    |       |
|            | ApoEε4(+) | AD      | 106                    | 79(74.5) | 26(24.5) | 1(1)     | 0.675 | 0.13    | 0.72  |
|            |           | control | 44                     | 31(70.5) | 13(29.5) | 0(0)     |       | 0.15    |       |
| rs10884402 | ApoEε4(-) | AD      | 130                    | 57(43.9) | 58(44.6) | 15(11.5) | 0.008 | 0.34    | 0.003 |
|            |           | control | 189                    | 65(34.4) | 76(40.2) | 48(25.4) |       | 0.46    |       |
|            | ApoEε4(+) | AD      | 106                    | 45(42.5) | 54(50.9) | 7(6.6)   | 0.199 | 0.32    | 0.2   |
|            |           | control | 44                     | 16(36.4) | 21(47.7) | 7(15.9)  |       | 0.4     |       |
| rs7078098  | ApoEε4(-) | AD      | 130                    | 68(52.3) | 50(38.5) | 12(9.2)  | 0.515 | 0.28    | 0.24  |
|            |           | control | 189                    | 87(46)   | 80(42.3) | 22(11.7) |       | 0.33    |       |
|            | ApoEε4(+) | AD      | 106                    | 49(46.2) | 51(48.1) | 6(5.7)   | 0.462 | 0.3     | 0.58  |
|            |           | control | 44                     | 20(45.4) | 19(43.2) | 5(11.4)  |       | 0.33    |       |
| rs950809   | ApoEε4(-) | AD      | 130                    | 47(36.2) | 68(52.3) | 15(11.5) | 0.202 | 0.38    | 0.76  |
|            |           | control | 189                    | 80(42.3) | 80(42.3) | 29(15.4) |       | 0.37    |       |
|            | ApoEε4(+) | AD      | 106                    | 40(37.7) | 58(54.7) | 8(7.6)   | 0.29  | 0.35    | 0.61  |
|            |           | control | 44                     | 21(47.7) | 18(40.9) | 5(11.4)  |       | 0.32    |       |

Abbreviations: MAF, minor allele frequency.

Genotypes and alleles are expressed as number (percentage). P values were calculated by  $\chi^2$  test 3×2 contingency table for genotype distribution and 2×2 contingency table for allele distribution.

doi:10.1371/journal.pone.0063621.t003

regression analysis, were also shown in Table 2. rs10884402 showed significant differences in additive mode (OR = 0.63, 95% CI (0.49, 0.82),  $P < 0.001$ ) and recessive mode (OR = 0.33, 95% CI (0.2, 0.57),  $P < 0.001$ ) (Table 2). Since the genotype and allele frequencies of rs12251340 were completely all the same between the patients and the controls, we did not conduct the further analysis and discussion. When data were stratified by the history of type-2 diabetes mellitus or the severity of AD, no significant difference was observed (data not show). When data were stratified by ApoEε4, the significant differences of rs10884402 polymorphism were observed in both genotype and allele frequencies between the patients and controls in the ApoEε4 (-) population (genotype  $P = 0.008$ ; allele  $P = 0.003$ ) (Table 3). When data were stratified by gender, the significant differences for rs17277986 and rs6584777 were shown between male and female AD patients (genotype  $P = 0.007$ ; allele  $P = 0.01$ ) (Table 4). However, the further analysis did not find the significant difference between the male AD patients and the male controls or the female AD patients and the female controls (Table 5). The difference between overall male and female (genotype  $P = 0.003$ ; allele  $P < 0.0001$ ) (Table 5) indicated the differences between male and female AD patients might be only related to the gender instead of disease. The other three SNPs showed no difference either between male and female

AD patients (Table 4). These results suggested there were no gender association for all five SNPs.

### Haplotype Analysis

Since the studied polymorphisms are assigned on the same chromosome, we accordingly performed the linkage analysis (Fig. 1), strong linkage patterns were observed between rs17277986 and rs6584777 in all samples ( $D' = 0.96$ ), as well as among rs10884402, rs7078098 and rs950809 ( $D' \geq 0.97$ ). Therefore, rs17277986 and rs6584777 constitute a block (block1) of two SNPs that are 5 kb apart, and rs10884402, rs7078098 and rs950809 constitute a block (block2) of three adjacent SNPs that are 2 kb apart and are in linkage disequilibrium (LD) in all samples. To facilitate identification of combinational effects of these five polymorphisms on AD risk, we employed haplotype analysis, which studies the frequency of the combination of multiple genetic variants. This is a more powerful statistical method than single-locus analysis. We focused on the haplotypes, which had a frequency of equal to or greater than 1% in all cases. The frequency of haplotypes composed of G-T-C (alleles in order of rs10884402, rs7078098, rs950809 polymorphisms, similarly hereinafter) was 34% in LOAD, which was significantly higher ( $P_{\text{sim}} = 0.002$ ) than that in control, whereas the frequencies of

**Table 4.** Genotype and allele frequencies for rs17277986, rs6584777,rs10884402, rs7078098 and rs950809 stratified by gender in Alzheimer’s patients.

| SNP ID     | Group      | n   | Genotype frequency (%) |           |           | P-value | MAF  | P-value |
|------------|------------|-----|------------------------|-----------|-----------|---------|------|---------|
|            |            |     | CC                     | CT        | TT        |         |      |         |
| rs17277986 | AD(Male)   | 120 | 98 (81.7)              | 20 (16.7) | 2 (1.6)   | 0.007   | 0.1  | 0.01    |
|            | AD(Female) | 116 | 75 (64.7)              | 40 (34.5) | 1 (0.8)   |         | 0.18 |         |
| rs6584777  | AD(Male)   | 120 | 98 (81.7)              | 20 (16.7) | 2 (1.6)   | 0.007   | 0.1  | 0.01    |
|            | AD(Female) | 116 | 75 (64.7)              | 40 (34.5) | 1 (0.8)   |         | 0.18 |         |
| rs10884402 | AD(Male)   | 120 | 52 (43.3)              | 57 (47.5) | 11 (9.2)  | 0.996   | 0.33 | 0.95    |
|            | AD(Female) | 116 | 50 (43.1)              | 55 (47.4) | 11 (9.5)  |         | 0.33 |         |
| rs7078098  | AD(Male)   | 120 | 62 (51.7)              | 52 (43.3) | 6 (5.0)   | 0.295   | 0.27 | 0.25    |
|            | AD(Female) | 116 | 55 (47.4)              | 49 (42.2) | 12 (10.3) |         | 0.31 |         |
| rs950809   | AD(Male)   | 120 | 44 (36.7)              | 64 (53.3) | 12 (10)   | 0.991   | 0.37 | 0.92    |
|            | AD(Female) | 116 | 43 (37.1)              | 62 (53.4) | 11 (9.5)  |         | 0.36 |         |

Abbreviations: MAF, minor allele frequency.

Genotypes and alleles are expressed as number (percentage). P values were calculated by  $\chi^2$  test 3×2 contingency table for genotype distribution and 2×2 contingency table for allele distribution.

doi:10.1371/journal.pone.0063621.t004

haplotypes composed of A-C-C and A-T-C was significantly lower ( $P_{sim} < 0.0001$ ) in LOAD. Frequency of haplotype C-C-G-T-C (alleles in order of rs17277986, rs6584777, rs10884402,

rs7078098, rs950809 polymorphisms, similarly hereinafter) was significantly higher ( $P_{sim} = 0.0031$ ), yet the frequencies of haplotype C-C-A-T-C, C-C-A-C-C and T-T-A-C-C were significantly

**Table 5.** Genotype and allele frequencies for rs17277986, rs6584777 stratified by gender in overall samples, Alzheimer’s patients and controls.

| SNP ID     | Group           | n   | Genotype frequency (%) |          |        | P-value | MAF  | P-value |
|------------|-----------------|-----|------------------------|----------|--------|---------|------|---------|
|            |                 |     | CC                     | CT       | TT     |         |      |         |
| rs17277986 | male            | 256 | 202(78.9)              | 52(20.3) | 2(0.8) | 0.003   | 0.09 | <0.0001 |
|            | female          | 213 | 138(64.8)              | 71(33.3) | 4(1.9) |         | 0.19 |         |
| rs6584777  | male            | 256 | 203(79.3)              | 51(19.9) | 2(0.8) | 0.003   | 0.09 | <0.0001 |
|            | female          | 213 | 139(65.2)              | 70(32.9) | 4(1.9) |         | 0.18 |         |
| rs17277986 | AD(Female)      | 116 | 75(64.6)               | 40(34.5) | 1(0.9) | 0.472   | 0.18 | 0.79    |
|            | Control(Female) | 97  | 63(64.9)               | 31(32)   | 3(3.1) |         | 0.19 |         |
| rs6584777  | AD(Female)      | 116 | 75(64.6)               | 40(34.5) | 1(0.9) | 0.446   | 0.18 | 0.9     |
|            | Control(Female) | 97  | 64(66)                 | 30(30.9) | 3(3.1) |         | 0.19 |         |
| rs17277986 | AD(Male)        | 120 | 98(81.7)               | 20(16.7) | 2(1.6) | 0.138   | 0.1  | 0.523   |
|            | Control(Male)   | 136 | 104(76.5)              | 32(23.5) | 0(0)   |         | 0.12 |         |
| rs6584777  | AD(Male)        | 120 | 98(81.7)               | 20(16.7) | 2(1.6) | 0.163   | 0.1  | 0.61    |
|            | Control(Male)   | 136 | 105(77.2)              | 31(22.8) | 0(0)   |         | 0.11 |         |

Abbreviations: MAF, minor allele frequency.

Genotypes and alleles are expressed as number (percentage). P values were calculated by  $\chi^2$  test 3×2 contingency table for genotype distribution and 2×2 contingency table for allele distribution.

doi:10.1371/journal.pone.0063621.t005



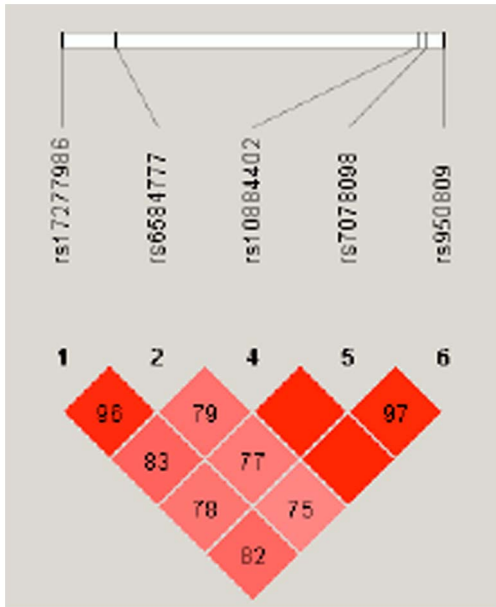

**Figure 1. LD patterns of SNPs rs17277986,rs6585777, rs10884402, rs7078098 and rs950809.** The linkage patterns between the 5 studied polymorphisms in all samples. The numbers in diamond represent the 100×D' in the form of standard color scheme. The upper bar denotes the relative distance among the studied polymorphisms. The bright red box denotes D' = 1 and LOD ≥ 2; the pink box denotes D' < 1 and LOD ≥ 2. doi:10.1371/journal.pone.0063621.g001

lower (Psim < 0.0001), in LOAD than in controls even after the statistical simulation (Table 6).

**Discussion**

APP processing and Aβ generation were considered to be the most important factors in pathogenesis of AD. Specifically, Small et al had suggested that APP processing might be modulated by Vps10-containing proteins [28], which could mediate the interaction between the retromer complex and APP. APP, β-secretases and γ-secretases were thus colocalized in the same intracellular compartment, where APP processing occurred. The genetic variations of *SORCS1*, the most recent member of the Vps10 family proteins [18], was also found to be associated with AD [20,22,29,30] in Caribbean Hispanics, Caucasian Hispanics and et al. In our current study, rs10884402 and rs950809 in intron 1 of *SORCS1* were found to be associated with LOAD in Chinese Han population. The most noteworthy finding of this study was that rs10884402 showed significant difference between LOAD and the healthy controls in both genotype and haplotype analyses. The further stratified analysis also revealed the significant difference for rs10884402 polymorphism in both genotype and allele frequencies between the patients and controls in the ApoEε4 (-) population. The rs10884402 A allele displayed a significant protective effect against the risk of LOAD compared with the G allele in additive mode. The larger number of A/A or A/G genotype in the ApoEε4 (-) normal control group reinforces our speculation that rs10884402 A allele is protective against AD. Moreover, we found this protective effect was irrelevant with the severity of AD. rs10884402 AA genotype vs G allele carriers conferred a 67% decreased risk for LOAD in recessive mode. This conclusion in

**Table 6. Haplotype frequencies (>1%) of the five SNPs rs17277986, rs6584777, rs10884402, rs7078098 and rs950809 in SorCS1 gene and their relative risks for Alzheimer’s disease.**

| Allele Combination             | All (n = 469) | LOAD (n = 236) | Control (n = 233) | Psim    | OR (95% CI); P        | OR (95% CI); P (after adjustment <sup>d</sup> ) |
|--------------------------------|---------------|----------------|-------------------|---------|-----------------------|-------------------------------------------------|
| 1:C-C-A-T-C                    | 0.03195       | 0              | 0.06212           | <0.0001 | NA                    | NA                                              |
| 2:C-C-A-C-C                    | 0.01804       | 0              | 0.03647           | <0.0001 | NA                    | NA                                              |
| 3:T-T-A-C-C                    | 0.01081       | 0              | 0.02143           | <0.0001 | NA                    | NA                                              |
| Total <sup>a</sup> 4:C-C-A-T-T | 0.31295       | 0.31208        | 0.32093           | 0.971   | Reference             | Reference                                       |
| 5:T-T-G-C-C                    | 0.10894       | 0.11189        | 0.10636           | 0.732   | 0.98(0.60,1.58);0.925 | 0.91(0.56,1.49);0.716                           |
| 6:C-C-G-T-T                    | 0.0268        | 0.02873        | 0.02403           | 0.489   | 1.04(0.45,2.41);0.925 | 1(0.42,2.35);0.998                              |
| 7:C-C-G-C-C                    | 0.16205       | 0.17556        | 0.14852           | 0.324   | 1.10(0.72,1.69);0.642 | 1.12(0.93,1.9);0.608                            |
| 8:C-C-G-T-C                    | 0.29709       | 0.34099        | 0.2486            | 0.003   | 1.32(0.93,1.9);0.121  | 1.35(0.95,1.94);0.098                           |
| Block 1 <sup>b</sup> 1:C-C     | 0.85608       | 0.86017        | 0.85193           | 0.708   | Reference             | Reference                                       |
| 2:T-T                          | 0.14179       | 0.13983        | 0.14378           | 0.916   | 0.96(0.65,1.4);0.815  | 0.91(0.62,1.33);0.617                           |
| 1:A-T-C                        | 0.03203       | NA             | 0.06496           | <0.0001 | NA                    | NA                                              |
| 2:A-C-C                        | 0.0289        | NA             | 0.05759           | <0.0001 | NA                    | NA                                              |
| Block 2 <sup>c</sup> 3:A-T-T   | 0.32511       | 0.33051        | 0.32091           | 0.889   | Reference             | Reference                                       |
| 4:G-C-C                        | 0.2729        | 0.28724        | 0.25941           | 0.399   | 0.98(0.7,1.39);0.936  | 0.97(0.68,1.37);0.85                            |
| 5:G-T-T                        | 0.02787       | 0.03088        | 0.02399           | 0.402   | 1.06(0.46,2.44);0.886 | 1.04(0.45,2.44);0.918                           |
| 6:G-T-C                        | 0.30582       | 0.34836        | 0.26181           | 0.002   | 1.23(0.86,1.74);0.254 | 1.26(0.89,1.8);0.195                            |

Abbreviations: OR, odds ratio; 95% CI, 95% confidence interval; Psim, Simulated P values; NA, not available.  
<sup>a</sup>Alleles in total haplotype were arrayed in order of rs17277986, rs6584777, rs10884402, rs7078098 and rs950809.  
<sup>b</sup>Alleles in block 1 haplotype were arrayed in order of rs17277986 and rs6584777.  
<sup>c</sup>Alleles in block 2 haplotype were arrayed in order of rs10884402, rs7078098 and rs950809.  
<sup>d</sup>Adjusting for age and gender.  
 doi:10.1371/journal.pone.0063621.t006

Chinese Han population was inconsistent with Reitz et al's report that A allele of this SNP was associated with lower MMSE scores in Caribbean Hispanics [22]. Haplotype is composed of different alleles, thus haplotype analysis provides more information about the effect of genetic interaction on phenotype than single polymorphism analysis. Haplotype analyses in our study showed that haplotypes A-T-C and A-C-C (alleles in order of rs10884402, rs7078098, rs950809) were only observed in controls with total frequencies reaching 12%, whereas frequency of haplotype G-T-C was significantly higher in LOAD group than that in the controls, in agreement with the results of our single-locus analyses. However, this is also different from Reitz et al's report that A-T-T haplotype for SNPs (alleles in order of rs10884402, rs7078098 and rs950809) were associated with LOAD in both NIA-LOAD dataset and Caribbean Hispanics datasets, and the complementary G-C-C haplotype was associated with higher MMSE scores in the NIA-LOAD dataset [22]. All above results indicated A allele in rs10884402 and C allele in rs950809 seemed to have a synergistic action because their combination was shown a protective effect against the risk of dementia, and A allele in rs10884402 might take a dominant place according to the results.

Our data showed negative association between rs17277986 and AD either in overall samples or in both gender subsets. However, when we reviewed all the case-control studies in the Alzgene data base and recent related studies, we found our result was different from that of Liang's study [30], in which rs17277986 showed significant association with AD in the overall datasets ( $p = 0.0025$ ) and in the female subset (allele  $p = 0.00002$ ). However Liang et al could not confirm the association in their follow-up validation analyses in the validation datasets (CAP, the Collaborative Alzheimer Project; NCRAD, the NCRAD repository at Indiana University; NIMH, the National Institute of Mental Health repository) [30]. Our result was different from Reitz's report either [30].

All above results indicated that several inconsistencies were presented in the different reports. However, we thought our data

was reliable because of the following reasons. All SNPs in our research had been genotyped using the method of SNaPshot, which was an advanced and accurate gene analysis technique. All genotype distributions of SNPs in our research were conformed to the expected Hardy-Weinberg proportions. Moreover, the distributions of the APOE polymorphisms in AD patients and controls showed a significant difference, being the same as what was expected. And interestingly, our data about rs17277986 and rs6584777 are almost coincide with the results of the study in a Northern Han Chinese population conducted by Tan's group [29], although the samples and experimental procedures were different. All these make our data trustworthy. One major and important reason for the inconsistency between our results and those of former studies is the different genetic background in different ethnic populations. The different environment and lifestyle may also need to be taken into consideration for the inconsistency because of the complexity of the interactions between genes and above factors. In addition, the size of sample group might be the third reason for the discrepancy. The larger sample size would be helpful for the further study.

In summary, our results implicated variations in intron 1 of *SORCS1* gene were associated with LOAD in Han Chinese. However, additional studies seeking to provide strong biological or clinical evidence for the association between *SORCS1* SNPs and LOAD, as well as longitudinal studies attempting to pursue gene-gene or gene-environment interactions of *SORCS1*, will be needed in the future.

## Author Contributions

Conceived and designed the experiments: JD SC JZ. Performed the experiments: WX JX Y. Wang. Analyzed the data: WN. Contributed reagents/materials/analysis tools: WX Y. Wang HT YD RR GW JM Y. Wu. Wrote the paper: WX JD.

## References

- Goedert M, Klug A, Crowther RA (2006) Tau protein, the paired helical filament and Alzheimer's disease. *J Alzheimers Dis* 9: 195–207.
- Jellinger KA (2006) Alzheimer 100—highlights in the history of Alzheimer research. *J Neural Transm* 113: 1603–1623.
- Price DL, Sisodia SS (1998) Mutant genes in familial Alzheimer's disease and transgenic models. *Annu Rev Neurosci* 21: 479–505.
- Gandy S (2005) The role of cerebral amyloid beta accumulation in common forms of Alzheimer disease. *J Clin Invest* 115: 1121–1129.
- Deng YL, Liu LH, Wang Y, Tang HD, Ren RJ, et al. (2012) The prevalence of CD33 and MS4A6A variant in Chinese Han population with Alzheimer's disease. *Hum Genet*.
- Carrasquillo MM, Belbin O, Hunter TA, Ma L, Bisceglia GD, et al. (2011) Replication of EPHA1 and CD33 associations with late-onset Alzheimer's disease: a multi-centre case-control study. *Mol Neurodegener* 6: 54.
- Gauthier S, Wu LY, Rosa-Neto P, Jia JP (2012) Prevention strategies for Alzheimer's disease. *Translational Neurodegeneration* 1: 13.
- Bertram L, Tanzi RE (2008) Thirty years of Alzheimer's disease genetics: the implications of systematic meta-analyses. *Nat Rev Neurosci* 9: 768–778.
- Ashford JW, Mortimer JA (2002) Non-familial Alzheimer's disease is mainly due to genetic factors. *J Alzheimers Dis* 4: 169–177.
- Edbauer D, Winkler E, Regula JT, Pesold B, Steiner H, et al. (2003) Reconstitution of gamma-secretase activity. *Nat Cell Biol* 5: 486–488.
- Xie ZC, Dong YL, Maeda U, Xia WM, Tanzi RE (2012) RNAi-mediated knock-down of Dab and Numb attenuate A $\beta$  levels via  $\gamma$ -secretase mediated APP processing. *Translational Neurodegeneration* 1: 8.
- Nielsen MS, Gustafsen C, Madsen P, Nyengaard JR, Hermey G, et al. (2007) Sorting by the cytoplasmic domain of the amyloid precursor protein binding receptor SorLA. *Mol Cell Biol* 27: 6842–6851.
- Offe K, Dodson SE, Shoemaker JT, Fritzi JJ, Gearing M, et al. (2006) The lipoprotein receptor LR11 regulates amyloid beta production and amyloid precursor protein traffic in endosomal compartments. *J Neurosci* 26: 1596–1603.
- Andersen OM, Reiche J, Schmidt V, Gotthardt M, Spoelgen R, et al. (2005) Neuronal sorting protein-related receptor sorLA/LR11 regulates processing of the amyloid precursor protein. *Proc Natl Acad Sci U S A* 102: 13461–13466.
- Hermey G, Riedel IB, Rezgaoui M, Westergaard UB, Schaller C, et al. (2001) SorCS1, a member of the novel sorting receptor family, is localized in somata and dendrites of neurons throughout the murine brain. *Neurosci Lett* 313: 83–87.
- Hermey G, Riedel IB, Hampe W, Schaller HC, Hermans-Borgmeyer I (1999) Identification and characterization of SorCS, a third member of a novel receptor family. *Biochem Biophys Res Commun* 266: 347–351.
- Jacobsen L, Madsen P, Moerstrup SK, Lund AH, Tommerup N, et al. (1996) Molecular characterization of a novel human hybrid-type receptor that binds the alpha2-macroglobulin receptor-associated protein. *J Biol Chem* 271: 31379–31383.
- Hermey G, Plath N, Hubner CA, Kuhl D, Schaller HC, et al. (2004) The three sorCS genes are differentially expressed and regulated by synaptic activity. *J Neurochem* 88: 1470–1476.
- Lane RF, Gatson JW, Small SA, Ehrlich ME, Gandy S (2010) Protein kinase C and rho activated coiled coil protein kinase 2 (ROCK2) modulate Alzheimer's APP metabolism and phosphorylation of the Vps10-domain protein, SorLI. *Mol Neurodegener* 5: 62.
- Reitz C, Tokuhira S, Clark LN, Conrad C, Vonsattel JP, et al. (2011) *SORCS1* alters amyloid precursor protein processing and variants may increase Alzheimer's disease risk. *Ann Neurol* 69: 47–64.
- Laumet G, Chouraki V, Grenier-Boley B, Legry V, Heath S, et al. (2010) Systematic analysis of candidate genes for Alzheimer's disease in a French, genome-wide association study. *Journal of Alzheimer's disease* : JAD 20: 1181–1188.
- Reitz C, Lee JH, Rogers RS, Mayeux R (2011) Impact of genetic variation in *SORCS1* on memory retention. *PLoS One* 6: e24588.
- Dubois B, Feldman HH, Jacova C, Dekosky ST, Barberger-Gateau P, et al. (2007) Research criteria for the diagnosis of Alzheimer's disease: revising the NINCDS-ADRDA criteria. *Lancet Neurol* 6: 734–746.

24. Corder EH, Saunders AM, Strittmatter WJ, Schmechel DE, Gaskell PC, et al. (1993) Gene dose of apolipoprotein E type 4 allele and the risk of Alzheimer's disease in late onset families. *Science* 261: 921–923.
25. Lake SL, Lyon H, Tantisira K, Silverman EK, Weiss ST, et al. (2003) Estimation and tests of haplotype-environment interaction when linkage phase is ambiguous. *Hum Hered* 55: 56–65.
26. Stram DO, Leigh Pearce C, Bretsky P, Freedman M, Hirschhorn JN, et al. (2003) Modeling and E-M estimation of haplotype-specific relative risks from genotype data for a case-control study of unrelated individuals. *Hum Hered* 55: 179–190.
27. Schaid DJ, Rowland CM, Tines DE, Jacobson RM, Poland GA (2002) Score tests for association between traits and haplotypes when linkage phase is ambiguous. *Am J Hum Genet* 70: 425–434.
28. Small SA, Gandy S (2006) Sorting through the cell biology of Alzheimer's disease: intracellular pathways to pathogenesis. *Neuron* 52: 15–31.
29. Wang HF, Yu JT, Zhang W, Wang W, Liu QY, et al. (2012) *SORCS1* and *APOE* polymorphisms interact to confer risk for late-onset Alzheimer's disease in a Northern Han Chinese population. *Brain Res* 1448: 111–116.
30. Liang X, Slifer M, Martin ER, Schnetz-Boutaud N, Bartlett J, et al. (2009) Genomic convergence to identify candidate genes for Alzheimer disease on chromosome 10. *Human mutation* 30: 463–471.
